# Supplementary material for: Mesoporous Co3O4@carbon composites derived from microporous cobalt-based porous coordination polymers for enhanced electrochemical properties in supercapacitors
Source: Royal Society of Chemistry journal article supplement (doi:10.1039/c5ra25920g), 2016-01-01

## Supporting Information

### **Mesoporous $\text{Co}_3\text{O}_4$ @ Carbon Composites Derived from Microporous Cobalt-Based Porous Coordination Polymers for Enhanced Electrochemical Properties in Supercapacitors**

Shuang Wang, Ting Wang, Ying Shi, Guang Liu, and Jinping Li\*

## Caption of Content

**Figure S1.** Simulated and experimental powder X-ray diffraction patterns for ZSA-1.

**Figure S2.** TGA curves of ZSA-1, activated ZSA-1 and  $\text{Co}_3\text{O}_4$  @ carbon composites.

**Figure S3.** SEM images for the  $\text{Co}_3\text{O}_4$  @ carbon composites.

**Figure S4.** EDX spectrum images of the  $\text{Co}_3\text{O}_4$  @ carbon composites.

**Figure S5.** HRTEM images for the  $\text{Co}_3\text{O}_4$  @ carbon composites.

**Figure S6.** SEM images for the as-synthesized  $\text{Co}_3\text{O}_4$  particles.

**Figure S7.** Specific capacitance versus different charge-discharge current density plots.

**Figure S8.** Cycling performance of  $\text{Co}_3\text{O}_4$  @ carbon composites at a current density of  $2 \text{ A}\cdot\text{g}^{-1}$ .

**Figure S9.** Cyclic voltammetry curves of ZSA-1 measured at different sweep rates.

**Figure S10.** Galvanostatic charge-discharge curves of ZSA-1 at different current densities.

**Figure S11.** Cyclic voltammetry curves of  $\text{Co}_3\text{O}_4$  particles measured at different sweep rates.

**Figure S12.** Galvanostatic charge-discharge curves of  $\text{Co}_3\text{O}_4$  particles at different current densities.

**Figure S1.** Simulated and experimental powder X-ray diffraction patterns for ZSA-1.

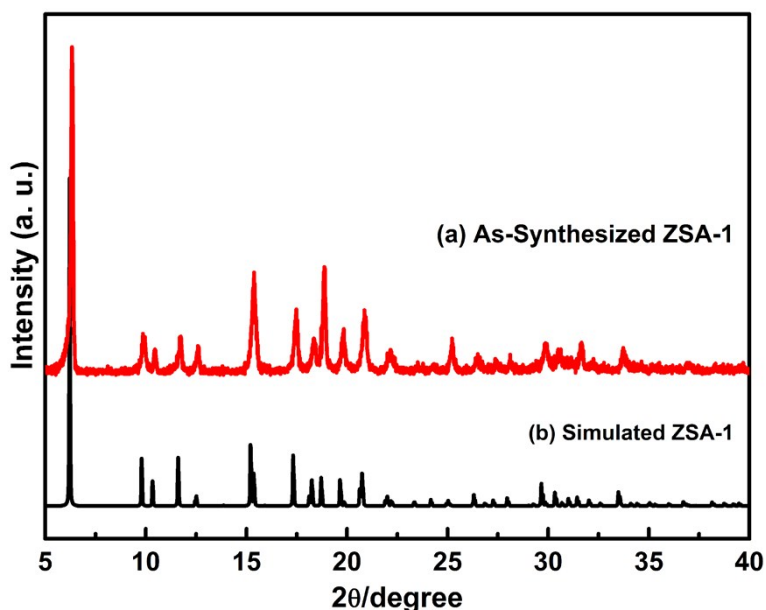

**Figure S2.** TGA curves of ZSA-1, activated ZSA-1 and  $\text{Co}_3\text{O}_4$  @ carbon composites.

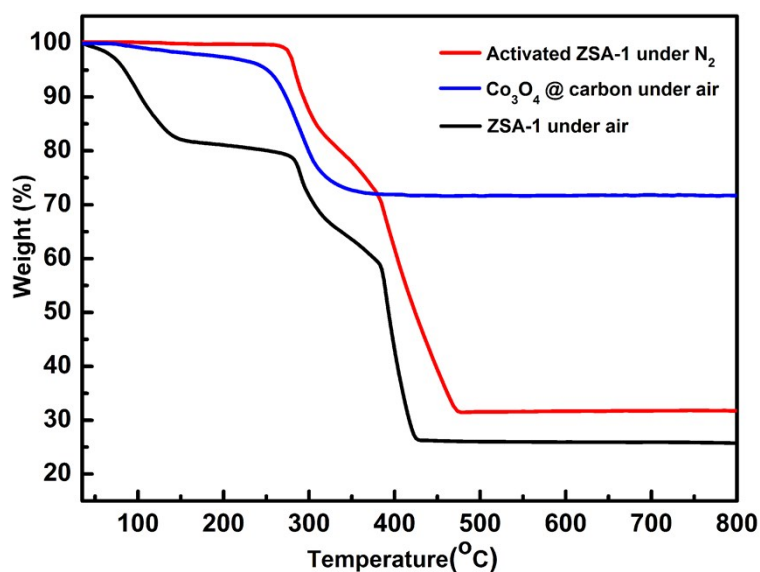

Thermogravimetric analysis for **ZSA-1** under air shows a weight loss of 18.60 % between 35 and 180°C, corresponding to the loss of guest  $\text{H}_2\text{O}$  molecules, for part of guest  $\text{H}_2\text{O}$  molecules were lost during the sample drying at room temperature. On further heating, a two-step weight loss of 55.7 % between 180 and 430 °C should be correspond to the release of 1, 2-propanediamine and the organic ImDC ligand (calcd: 54.98 %). The residual weight of 26.15 % corresponds to  $\text{Co}_3\text{O}_4$ .

**Figure S3.** SEM images for the  $\text{Co}_3\text{O}_4$  @ carbon composites.

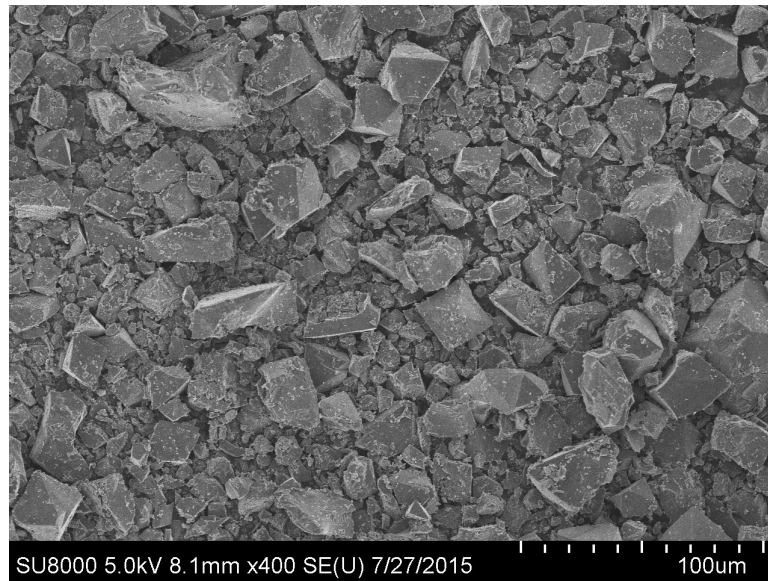

**Figure S4.** EDX spectrum images of the  $\text{Co}_3\text{O}_4$  @ carbon composites.

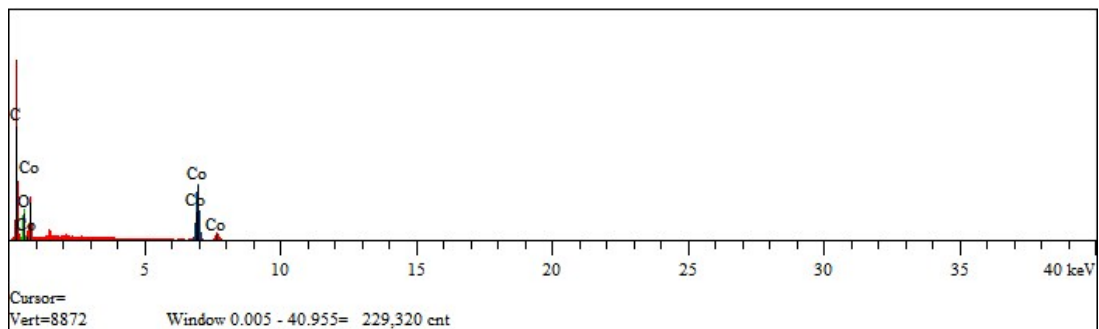

**Figure S5.** HRTEM images for the  $\text{Co}_3\text{O}_4$  @ carbon composites.

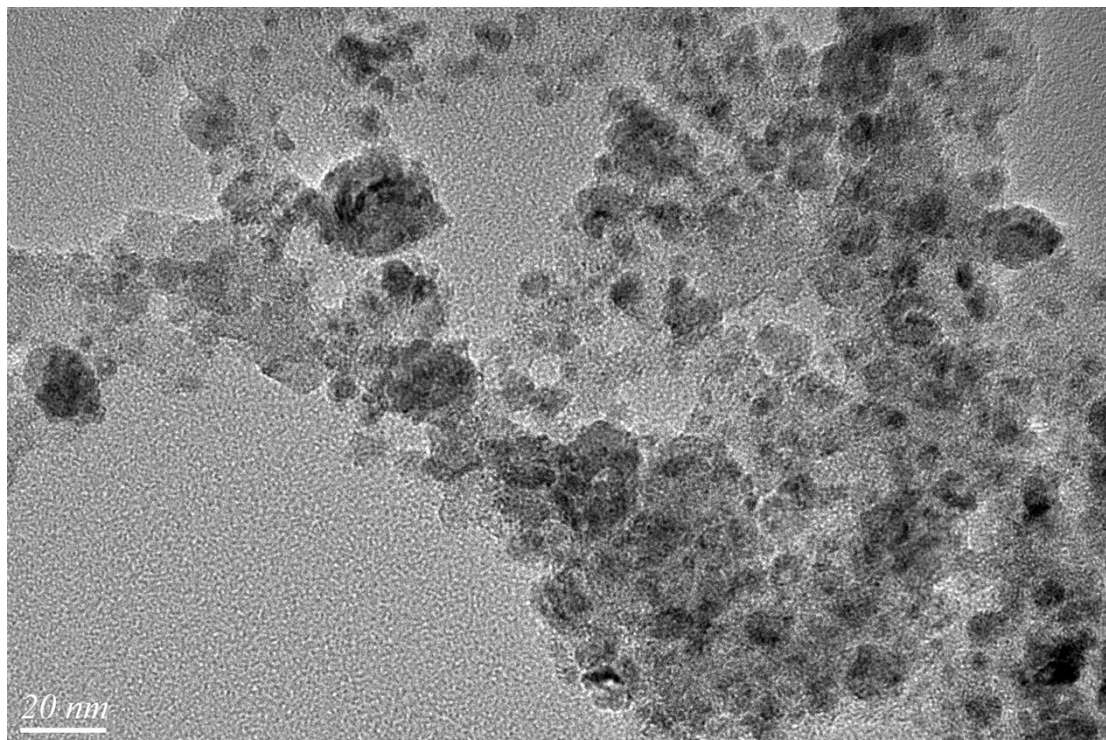

**Figure S6.** SEM images for the as-synthesized  $\text{Co}_3\text{O}_4$  particles.

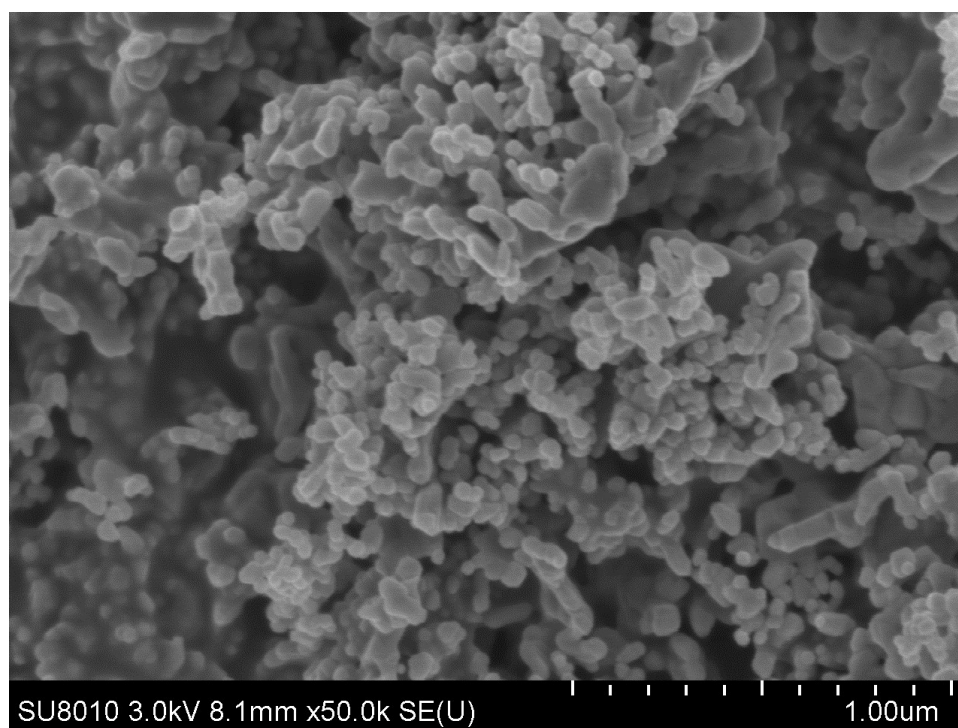

Figure S7. Specific capacitance versus different charge-discharge current density plots.

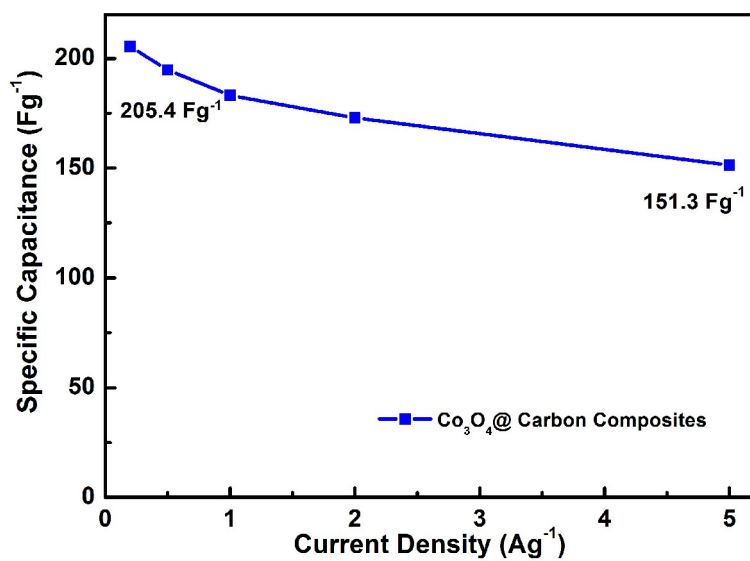

Figure S8. Cycling performance of Co<sub>3</sub>O<sub>4</sub> @ carbon composites at a current density of 2 A·g<sup>-1</sup>.

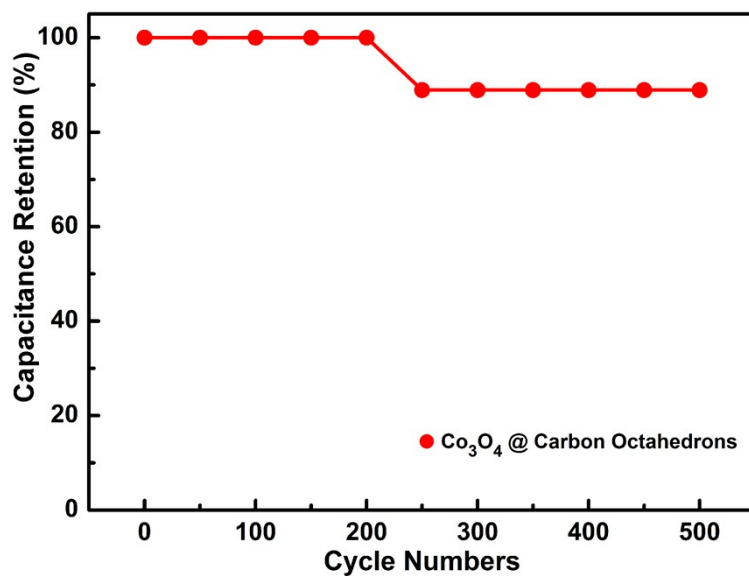

**Figure S9.** Cyclic voltammety curves of ZSA-1 measured at different sweep rates.

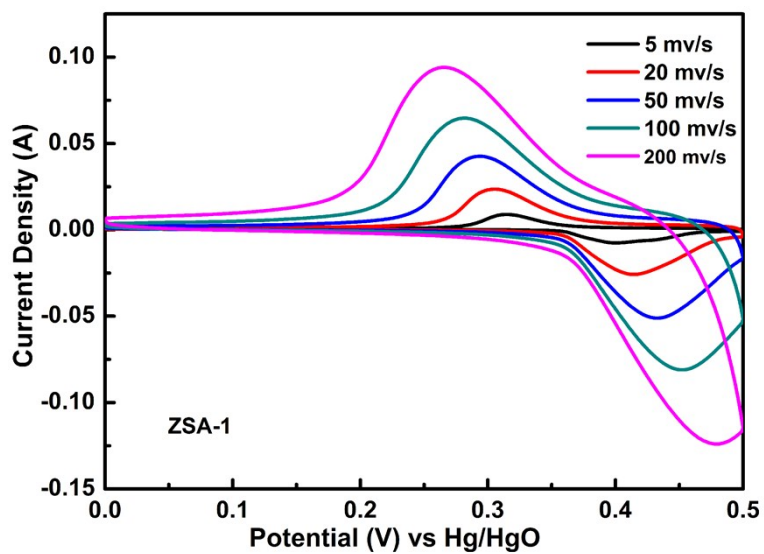

**Figure S10.** Galvanostatic charge-discharge curves of ZSA-1 at different current densities.

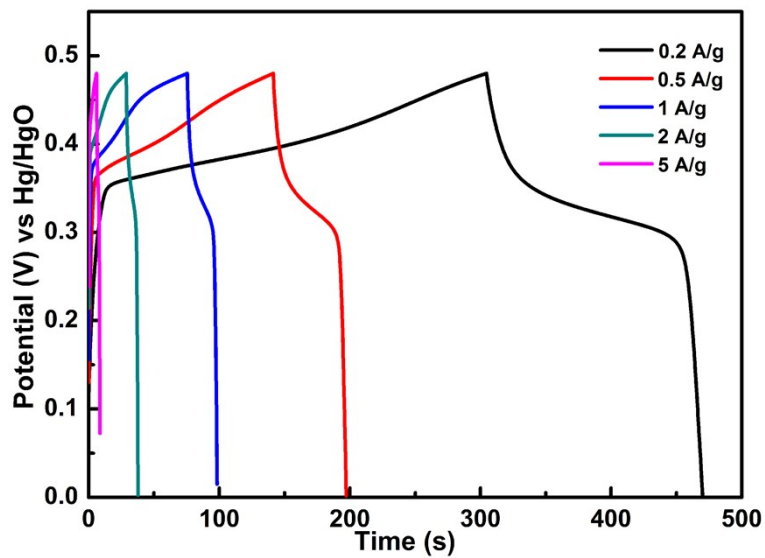

**Figure S11.** Cyclic voltammetry curves of  $\text{Co}_3\text{O}_4$  particles measured at different sweep rates.

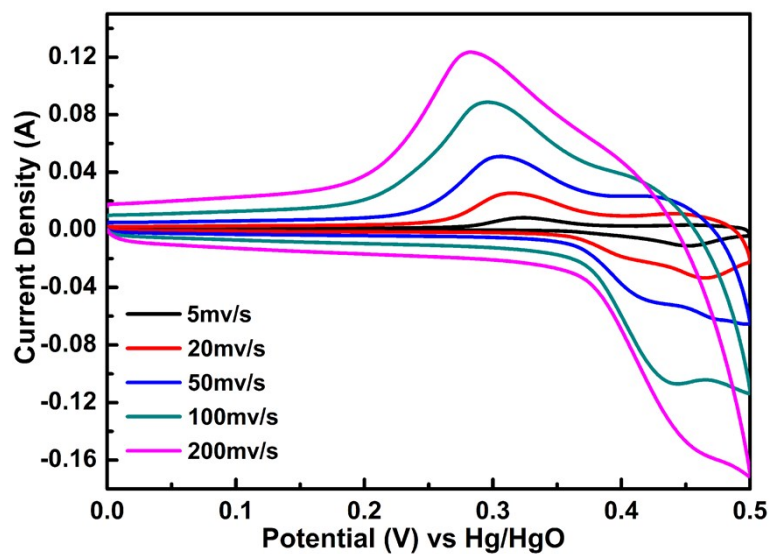

**Figure S12.** Galvanostatic charge-discharge curves of  $\text{Co}_3\text{O}_4$  particles at different current densities.

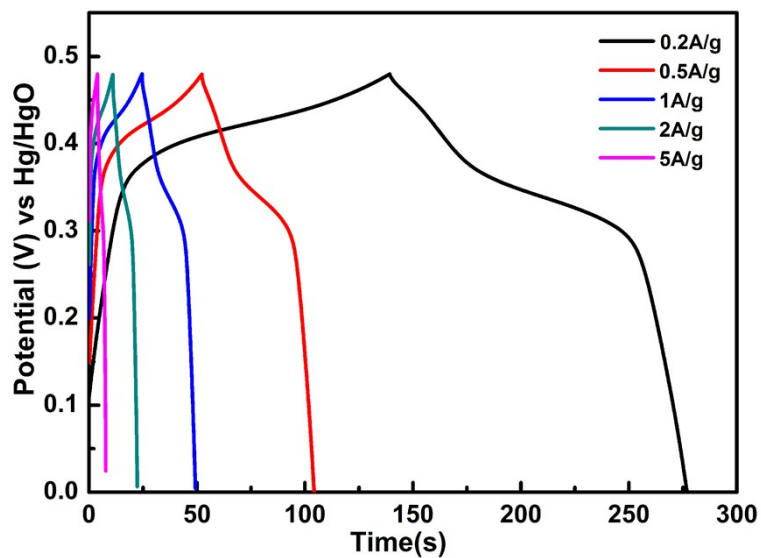

Supplement: c5ra25920g1.pdf [file c5ra25920g1.pdf]
